# Supplementary material
Source: PubMed Central journal article supplement (PMC3961603)
Supplement: jid2013481x1.pdf [file jid2013481x1.pdf]

Supplementary Figure 1.

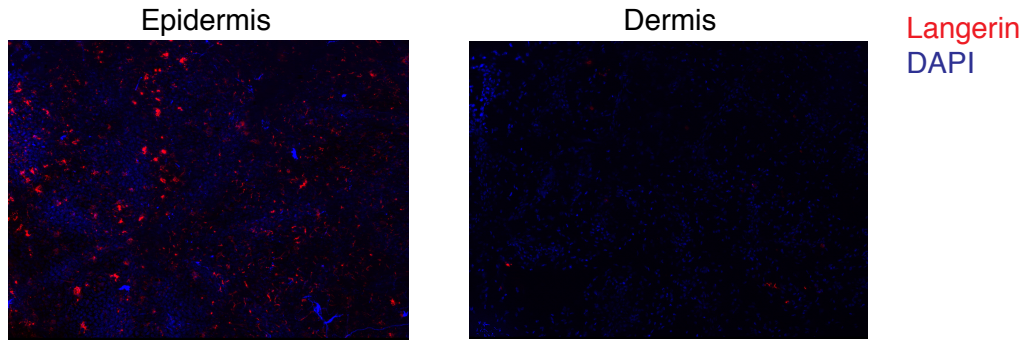

Epidermal sheet was separated from dermis using dispase. Epidermal and dermal sheets were immunostained for Langerin (red) to identify Langerhans cells (LCs) which are abundant in the epidermis but very rare in the dermis.

**Supplementary Table 1.**

| Sample ID | Age | Sex | Diagnosis                             | Site biopsied |
|-----------|-----|-----|---------------------------------------|---------------|
| SK1       | 35  | F   | Atopic dermatitis                     | Thigh         |
| SK2       | 46  | F   | Psoriasis                             | Back          |
| SK3       | 22  | M   | Atopic dermatitis                     | Back          |
| SK4       | 50  | M   | Atopic dermatitis                     | Thigh         |
| SK5       | 50  | M   | CD4+ T cell lymphoma                  | Abdomen       |
| SK6       | 50  | M   | Erythrodermic CD4+ T cell lymphoma    | Abdomen       |
| SK7       | 70  | F   | CD4+ T cell lymphoma                  | Leg           |
| SK8       | 41  | M   | Psoriasis                             | Arm           |
| SK9       | 64  | F   | Graft versus host disease (grade 2)   | not specified |
| SK10      | 24  | F   | Graft versus host disease (grade 2-3) | not specified |
